# Supplementary material for: Constitutive knockout of interleukin-6 ameliorates memory deficits and entorhinal astrocytosis in the MRL/lpr mouse model of neuropsychiatric lupus
Source: PubMed Central journal article supplement (PMC11007930; doi:10.1186/s12974-024-03085-9), 2024-04-10
Supplement: 12974_2024_3085_MOESM1_ESM.pdf [file 12974_2024_3085_MOESM1_ESM.pdf]

## Constitutive knockout of interleukin-6 ameliorates memory deficits and entorhinal astrocytosis in the MRL/lpr mouse model of neuropsychiatric lupus

Additional file

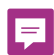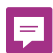

### ~~Data S1. MRL/lpr mice used in CSF analyses display expected NPSLE~~

**phenotype.** Before carrying out proteomic analysis of MRL/lpr serum and CSF, we first wanted to confirm the expected NPSLE phenotype in this cohort of mice. We observed that the MRL/lpr mice intended for CSF analysis did display worse learning and memory, increased depression-like disease, and prominent anxiety-like behaviors. The lupus mice exhibited worse novelty preference on OP (MRL/lpr: 64% failed (n=39) vs MRL/mpj: 38% failed (n=39); \*p=0.024), more immobility on Porsolt swim (MRL/lpr: 31.8±1.5% (n=38) vs MRL/mpj: 23.2±1.4% (n=39), \*\*\*\*p<0.0001), and reduced center time in the open field (MRL/lpr: 11.8±0.9% (n=39) vs MRL/mpj: 16.3±1.4% (n=40); \*\*p=0.01). Respectively, these scores represent poorer learning and memory, the presence of depressive-like behavior, and increased anxiety-like behavior. Behavioral spectrometry did not reveal any difference between genotypes in baseline activity or locomotion.

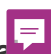

### ~~Data S2. Microglial density and thickness of the CA1 region of the~~

**hippocampus in IL-6 KO and IL-6 WT mice.** To further assess the hippocampal enrichment of the *iba1* gene in the hippocampus of IL-6 KO MRL/lpr mice, we quantified Iba1+ cells in the CA1 region of the hippocampus. Density of Iba1+ cells in CA1 was comparable between IL-6 KO and IL-6 WT MRL/lpr mice (IL-6 KO: 45.0±3.3 cells/mm<sup>2</sup> (n=8) vs IL-6 WT: 45.8±3.1 cells/mm<sup>2</sup> (n=8); p=0.959). Beyond gliosis, reductions in CA1 thickness can accompany learning and memory deficits. To assess this alternate hypothesis of our behavioral findings, we measured the ventral-dorsal thickness of the entire CA1 subregion and the CA1 neuronal soma layer. Neither the subregion (IL-6 KO: 807.5±18.8 μm (n=8) vs IL-6 WT: 830.0±27.2 μm (n=8); p=0.328) nor the neuron layer (IL-6 KO: 59.6±1.8 μm (n=8) vs IL-6 WT: 69.8±7.0 μm (n=8); p=0.574).

| Condition | Genotype            | Sex    | Cohort | n  | Terminal age (weeks) | Animal weight (g) |
|-----------|---------------------|--------|--------|----|----------------------|-------------------|
| IL-6 WT   | IL-6 +/+<br>MRL/lpr | Female | A + B  | 15 | 17.8 +/- 0.4         | 36 +/- 1          |
| IL-6 KO   | IL-6 -/-<br>MRL/lpr | Female | A + B  | 15 | 17.2 +/- 0.3         | 33.6 +/- 0.9      |
| p-value   | -                   | -      | -      | -  | 0.276                | 0.078             |

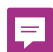

**Table S1. IL-6 cohort characteristics.** Descriptive features and systemic disease assessment of the combined cohorts of IL-6 WT and KO mice. Within-genotype outcomes were statistically equivalent between cohort A and B. Means +/- standard errors are provided for each outcome measured. OD, relative optical density on ELISA. \*p<0.05, \*\*p<0.01

|   | Behavioral test          | Abnormal murine behavior                     | Purpose / Human correlate            |
|---|--------------------------|----------------------------------------------|--------------------------------------|
| 1 | Behavioral spectrometry  | -                                            | Baseline locomotor activity          |
| 2 | Open field task          | Center avoidance                             | Anxiety                              |
| 3 | Object placement (OP)    | Loss of novelty preference                   | Cognitive & position memory deficits |
| 4 | Object recognition (OR)  | Loss of novelty preference                   | Cognitive & identity memory deficits |
| 5 | Porsolt swim (PS)        | Increased floating<br>(Learned helplessness) | Depression                           |
| 6 | Social preference (SP)   | Social avoidance                             | Anhedonia, mood dysregulation        |
| 7 | Elevated plus maze (EPM) | Open arm avoidance                           | Anxiety                              |

**Table S2. Behavioral tests used in assessment of MRL/lpr NPSLE-like disease.**

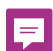

| Condition | Genotype         | n | whole cortex<br>expression: <i>aif1</i> | whole cortex<br>expression: <i>gfap</i> | whole cortex<br>expression: <i>nos2</i> |
|-----------|------------------|---|-----------------------------------------|-----------------------------------------|-----------------------------------------|
| IL-6 WT   | IL-6 +/+ MRL/lpr | 6 | 0.84 +/- 0.09                           | 1.49 +/- 0.16                           | 2.65 +/- 0.41                           |
| IL-6 KO   | IL-6 -/- MRL/lpr | 7 | 0.59 +/- 0.05                           | 1.03 +/- 0.11                           | 1.82 +/- 0.22                           |
| p-value   | -                | - | <b>0.049*</b>                           | <b>0.044*</b>                           | 0.118                                   |

  

| Condition | Genotype         | n     | hippocampus<br>expression: <i>aif1</i> | hippocampus<br>expression: <i>gfap</i> | hippocampus<br>expression: <i>nos2</i> |
|-----------|------------------|-------|----------------------------------------|----------------------------------------|----------------------------------------|
| IL-6 WT   | IL-6 +/+ MRL/lpr | 5 - 6 | 0.47 +/- 0.02                          | 2.04 +/- 0.18                          | 1.25 +/- 0.22                          |
| IL-6 KO   | IL-6 -/- MRL/lpr | 6     | 0.62 +/- 0.05                          | 1.92 +/- 0.14                          | 1.58 +/- 0.33                          |
| p-value   | -                | -     | <b>0.040*</b>                          | 0.613                                  | 0.435                                  |

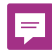

**Table S3. Glial gene expression results in the brain.** Results from qPCR analysis

of cortical and hippocampal expression of key genes are provided. Cohort A was used for gene expression analyses, while Cohort B was reserved for histologic analysis. Mean fold change +/- standard error is provided for each outcome measured. Within-genotype outcomes were statistically equivalent between cohort A and B. \*p<0.05.
